# Supplementary material for: Activation mechanism of Yarrowia lipolytica lipase immobilized on carbon nanotubes
Source: Royal Society of Chemistry journal article supplement (doi:10.1039/c2sm25231g), 2012-01-01
Supplement: c2sm25231g.pdf [file c2sm25231g.pdf]

## Supporting information

**Table S1. Six orientations for the adsorption of the lipase on the CNT**

| Orientation      | Residues initially above the CNT surface             | Interaction energy between the lipase and CNT( kJ/mol) |
|------------------|------------------------------------------------------|--------------------------------------------------------|
| I (Figure S4a)   | Leu45, Ala48, Leu254, Ile255, Ile301                 | -417.6                                                 |
| II (Figure S4b)  | Leu64, Ile100, Met101, Pro104                        | -381.3                                                 |
| III (Figure S4c) | Pro104, Leu105, Leu110, Leu124                       | -377.6                                                 |
| IV (Figure S4d)  | Leu91, Ile95, Ile100, Met101, Val283, Val285, Ile286 | -267.2                                                 |
| V (Figure S4e)   | Val 1, Ala275, Leu279, Leu280, Val283                | -246.9                                                 |
| VI (Figure S4f)  | Gly34, Phe38, Pro40, Leu45, Ala48, Val298            | -239.6                                                 |

**Table S2. Salt bridges for the immobilized lipases**

|        | Simulation time                                                                                                                                                                                                                                                                                                                                           |                                                                                                                                                                                                                                                                                                                                                                                               |
|--------|-----------------------------------------------------------------------------------------------------------------------------------------------------------------------------------------------------------------------------------------------------------------------------------------------------------------------------------------------------------|-----------------------------------------------------------------------------------------------------------------------------------------------------------------------------------------------------------------------------------------------------------------------------------------------------------------------------------------------------------------------------------------------|
|        | 0 ns                                                                                                                                                                                                                                                                                                                                                      | 50 ns                                                                                                                                                                                                                                                                                                                                                                                         |
| Case 1 | <div>Found 18 salt bridges.<br/><br/>ASP153-LYS79<br/>GLU54-LYS39<br/>GLU54-HIS76<br/>ASP251-ARG228<br/>ASP230-HIS289<br/>GLU58-LYS36<br/>GLU296-ARG86<br/>GLU19-ARG23<br/>ASP61-ARG63<br/>ASP93-HIS89<br/>ASP212-LYS215<br/>GLU209-LYS203<br/>ASP219-LYS221<br/>GLU19-HIS49<br/>GLU247-ARG224<br/>ASP181-LYS221<br/>GLU57-LYS143<br/>ASP181-LYS176</div> | <div>Found 20 salt bridges.<br/><br/>ASP11-LYS215<br/>ASP153-LYS79<br/>GLU54-LYS39<br/>GLU54-HIS76<br/>ASP230-HIS289<br/>GLU58-LYS36<br/>GLU296-ARG86<br/>ASP202-LYS203<br/>GLU57-LYS143<br/>ASP61-ARG63<br/>ASP219-LYS218<br/>GLU19-ARG23<br/>ASP251-ARG228<br/>ASP97-HIS126<br/>GLU209-LYS203<br/>ASP145-LYS143<br/>GLU247-ARG224<br/>ASP181-LYS221<br/>GLU92-HIS89<br/>ASP181-LYS176</div> |
| Case 2 | <div>Found 14 salt bridges.<br/><br/>ASP230-HIS289<br/>GLU54-LYS39<br/>ASP181-LYS221<br/>ASP153-LYS79<br/>GLU296-ARG86<br/>GLU19-ARG23<br/>ASP61-ARG63<br/>ASP251-ARG228<br/>ASP93-HIS89<br/>GLU209-LYS203<br/>ASP181-LYS176<br/>GLU247-ARG224<br/>GLU19-HIS49<br/>GLU57-LYS143</div>                                                                     | <div>Found 17 salt bridges.<br/><br/>ASP230-HIS289<br/>ASP251-ARG228<br/>ASP181-LYS221<br/>ASP219-LYS215<br/>ASP153-LYS79<br/>GLU296-ARG86<br/>GLU54-LYS39<br/>GLU19-ARG23<br/>ASP61-ARG63<br/>ASP97-ARG99<br/>ASP93-HIS89<br/>GLU209-LYS203<br/>GLU54-HIS76<br/>GLU247-ARG224<br/>GLU13-LYS218<br/>ASP67-ARG63<br/>GLU57-LYS143</div>                                                        |

a)

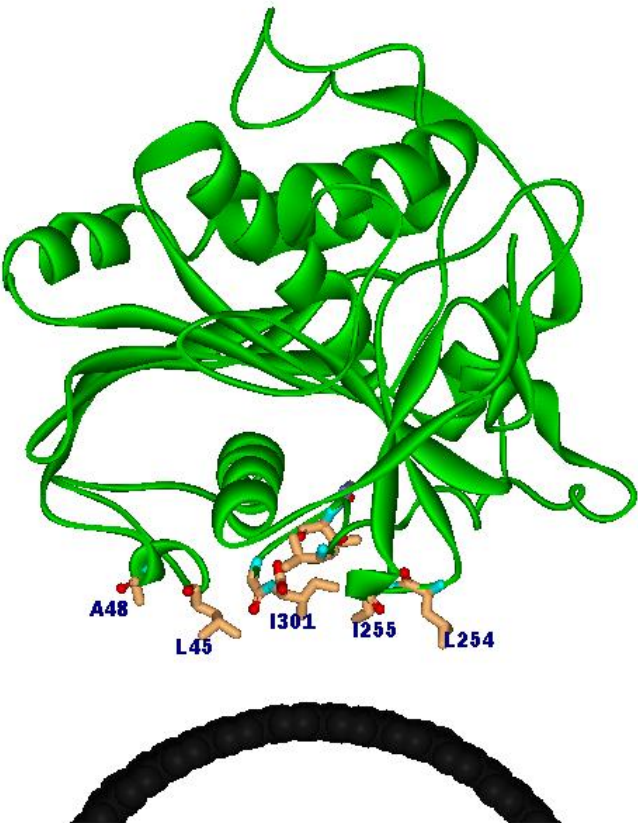

b)

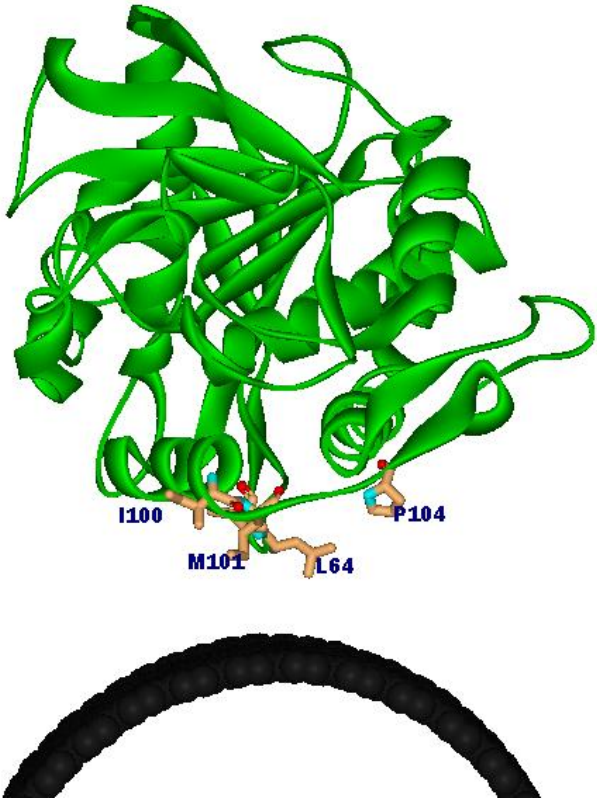

c)

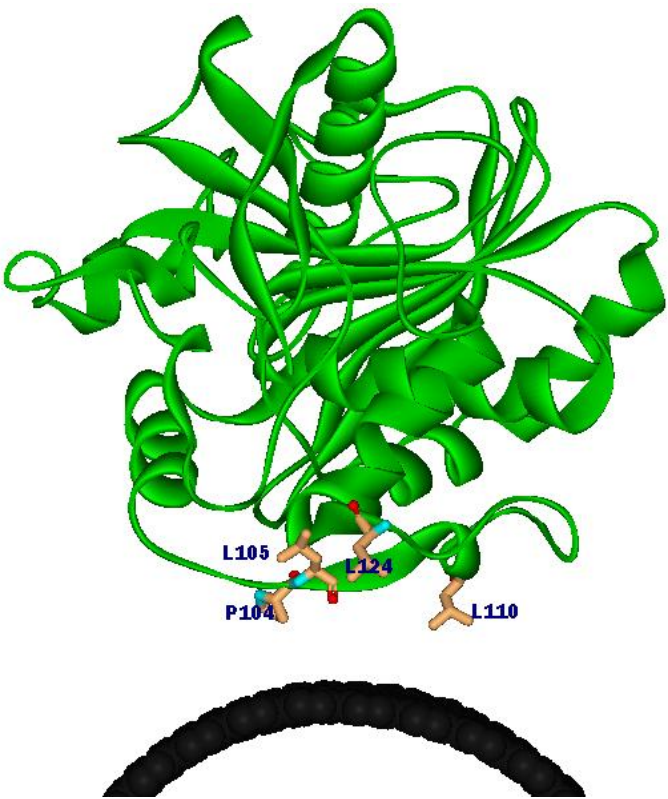

d)

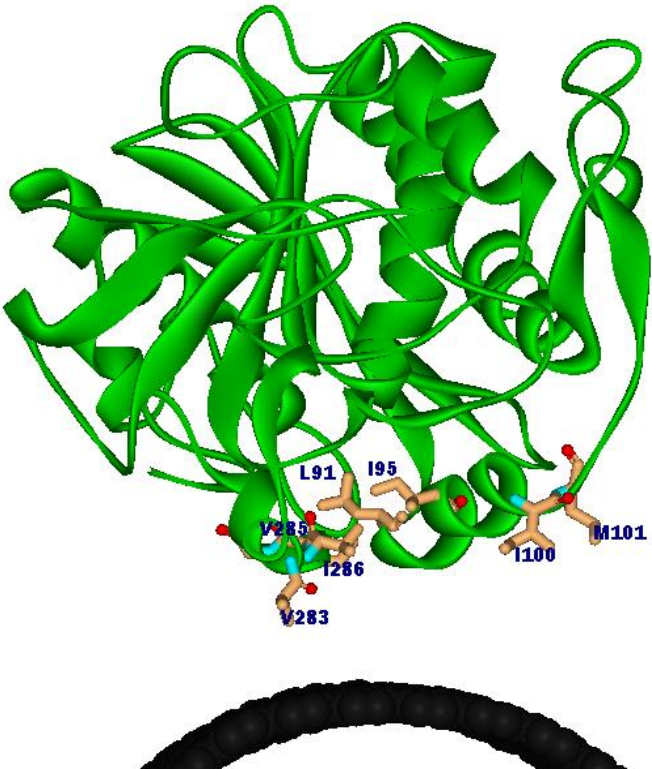

e)

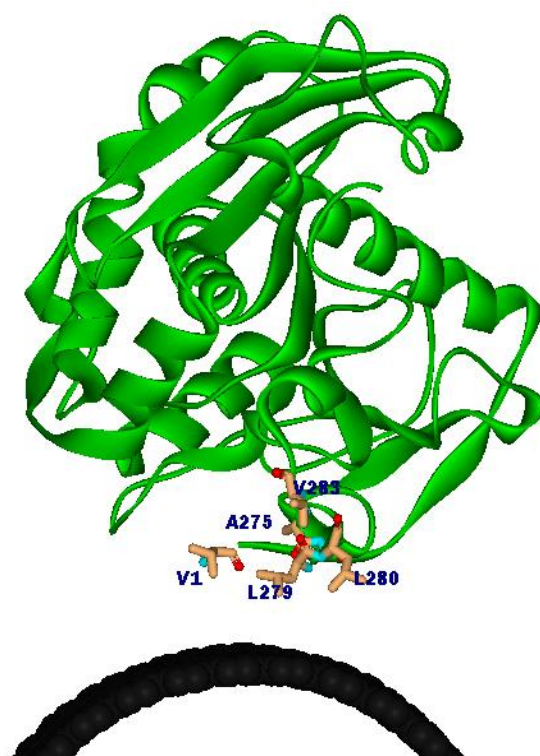

f)

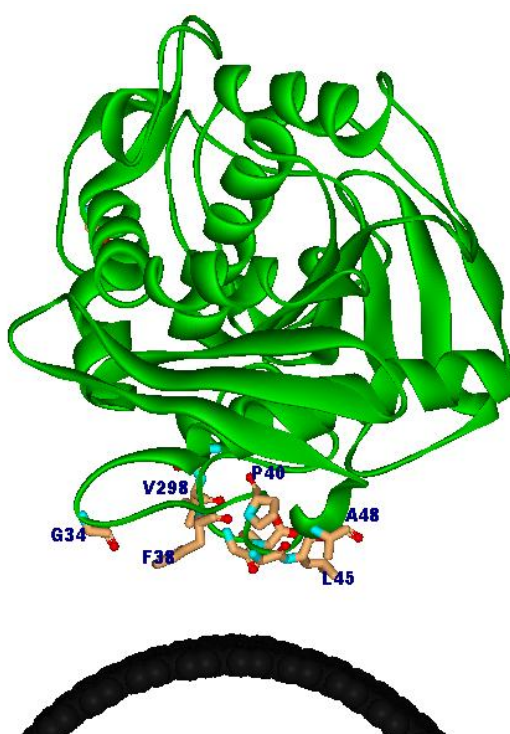

**Figure S1. Six starting orientations with the residues in orange above the CNT surface.**

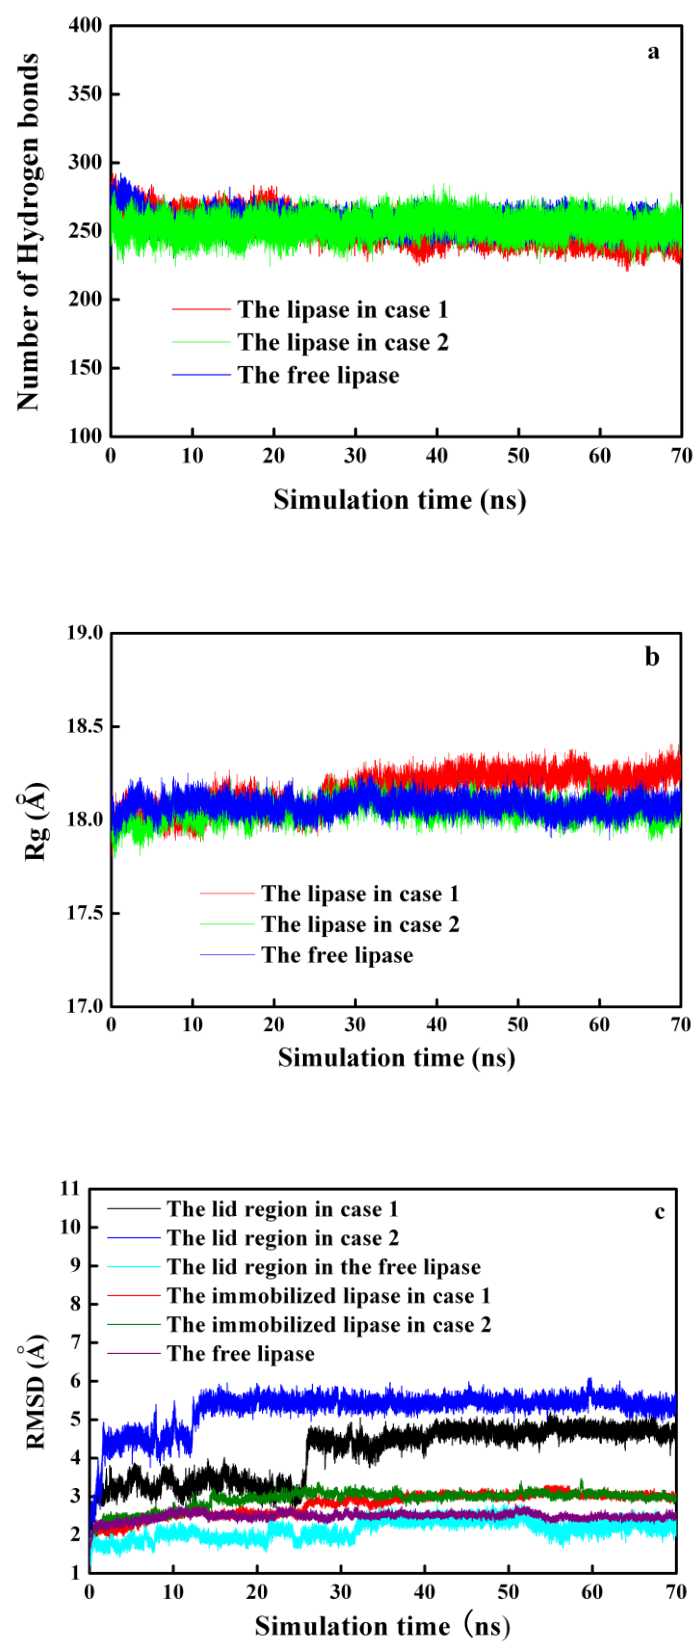

Figure S2. Number of hydrogen bonds (a), radius of gyration (b), and RMSD (c).



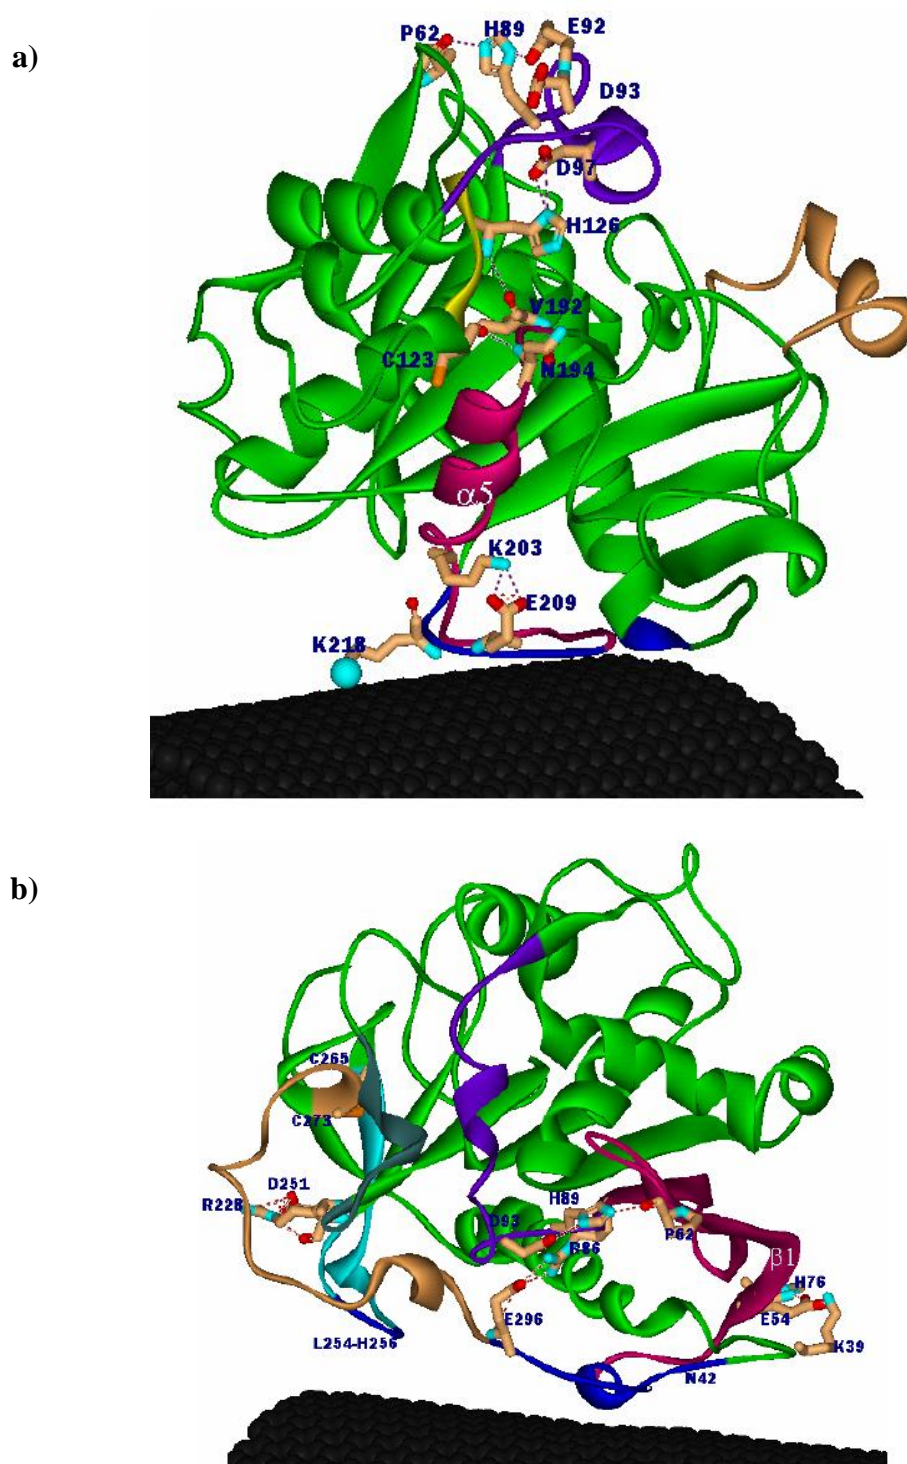

**Figure S3.** Simulation snapshots at 50 ns for case 1 (a) and case 2 (b).

In the snapshots, the segments in contact with the CNT are shown in blue. The lid is shown in violet, and the segment (Asn 277 – Leu 290) is shown in orange. The hydrogen bond and salt bridge interactions between the residues, which contribute to the propagation of the interactions, are indicated by the dashed lines.

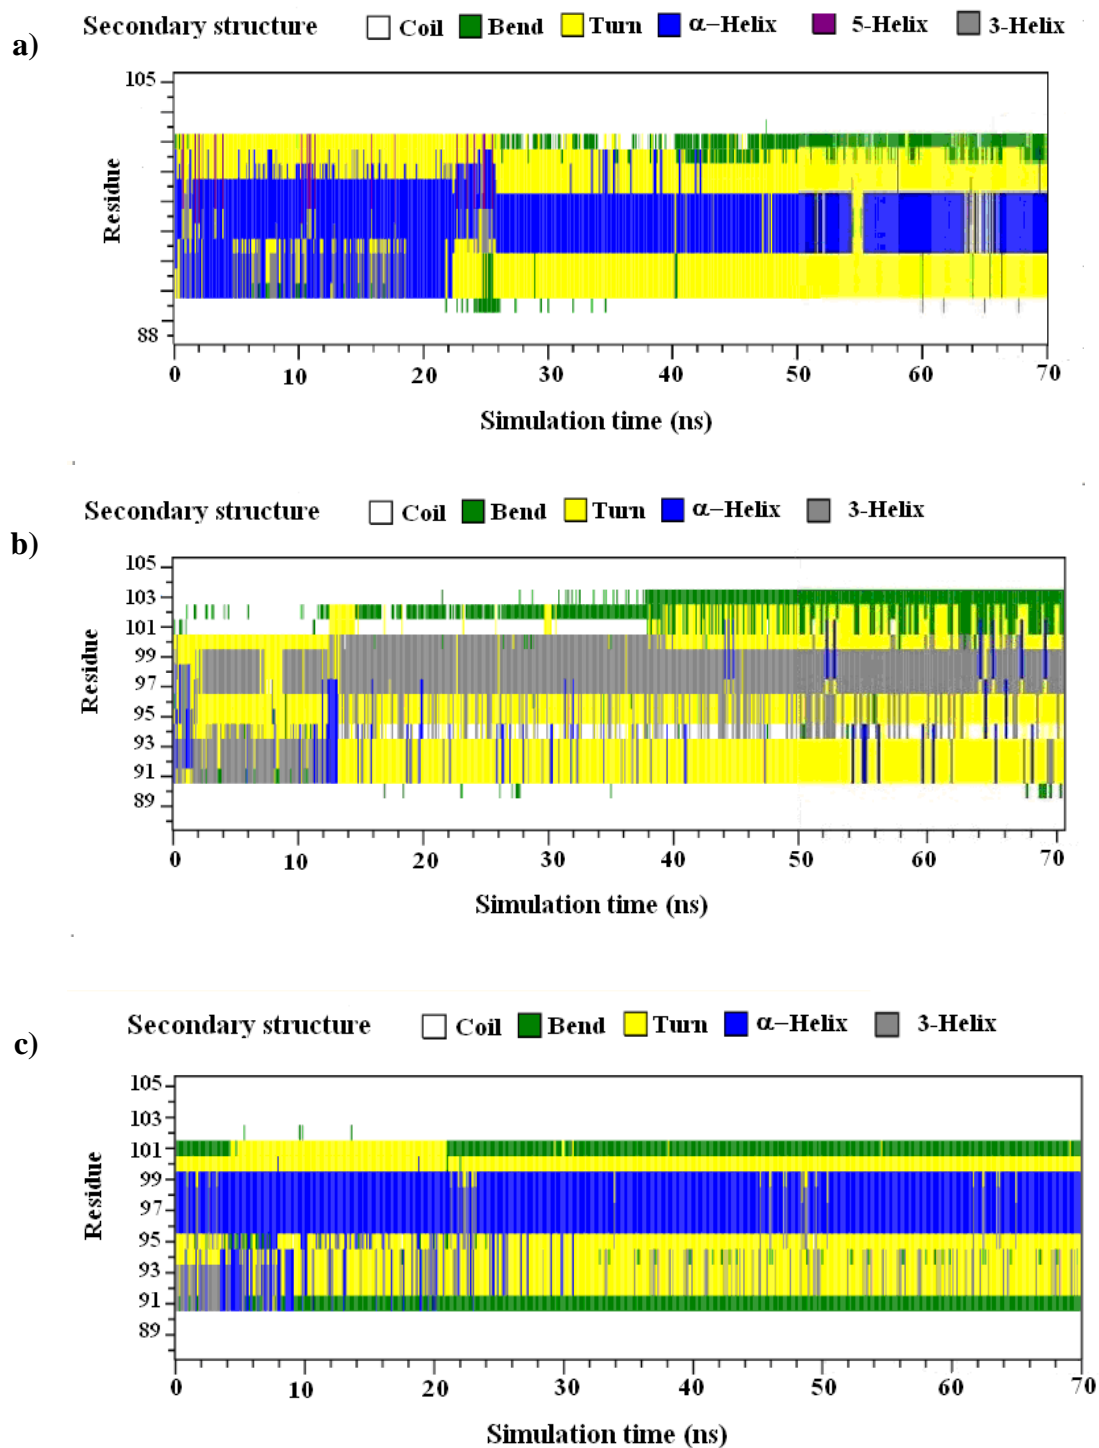

**Figure S4. The conformational change of the lid with simulation time.**  
(a) The lipase in case 1; (b) The lipase in case 2; (c) The free lipase.



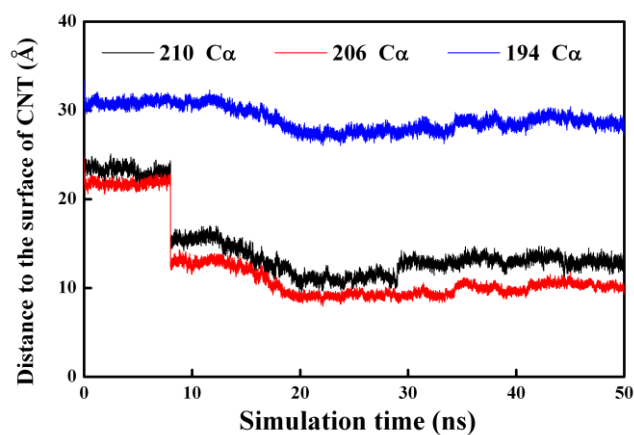

a

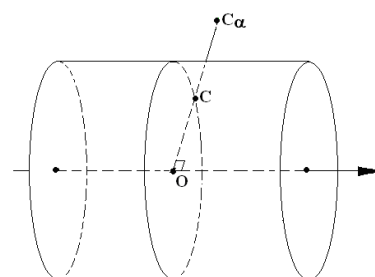

b

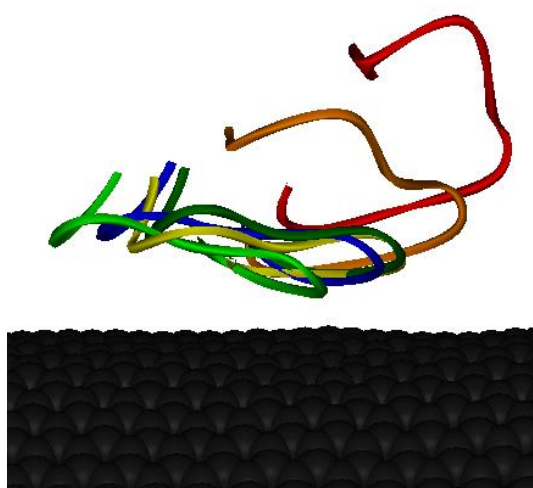

c

**Figure S5.** (a) The distance between the  $C\alpha$  atoms and the surface of the CNT.  
(b) Illustrating the distance between the  $C\alpha$  and the carbon atom of the CNT, which equals to the distance  $OC\alpha$  minus the radius  $OC$  of the CNT.  
(c) The movement of the loop (Phe 206–Arg 220) toward the CNT surface with simulation time for case 1, in which red (0 ns), orange (10 ns), yellow (20 ns), green (30 ns), olive (40 ns), and blue (50 ns)
